# Supplementary material for: Simultaneous CD8+ T-Cell Immune Response against SARS-Cov-2 S, M, and N Induced by Endogenously Engineered Extracellular Vesicles in Both Spleen and Lungs
Source: PubMed Central journal article supplement (PMC7999804; doi:10.3390/vaccines9030240), 2021-03-10
Supplement: vaccines-09-00240-s001.pdf [file vaccines-09-00240-s001.pdf]

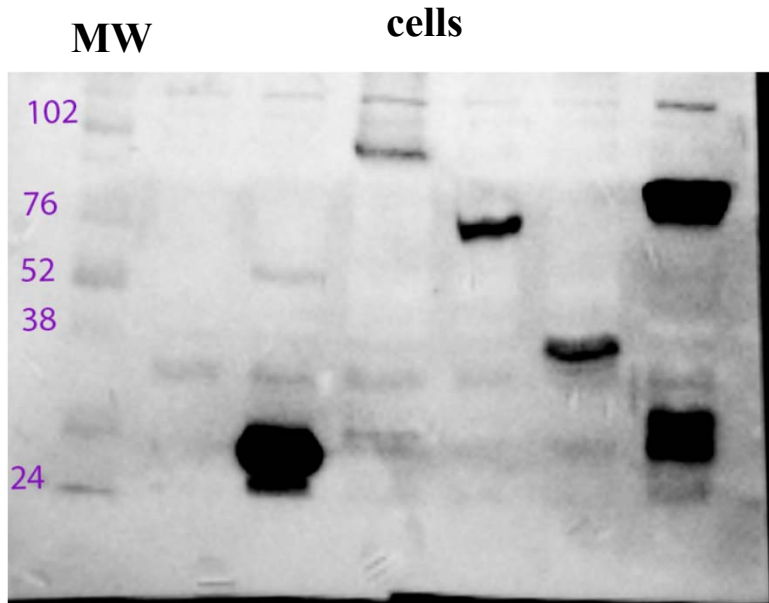

**Anti-Nef**

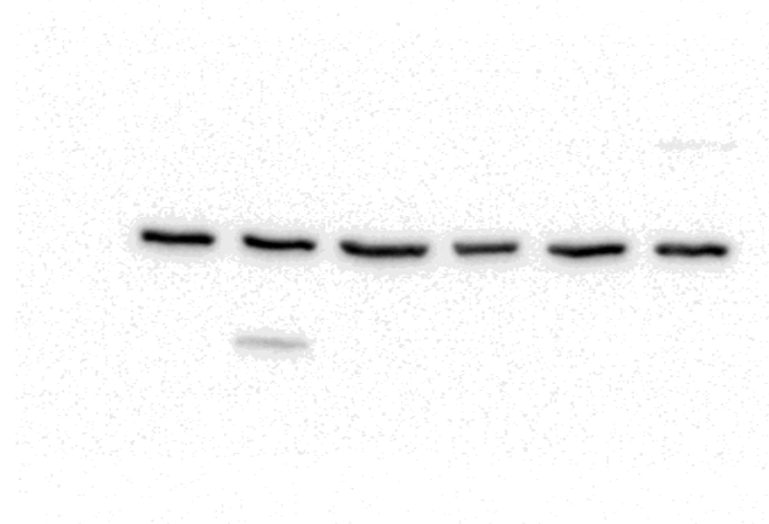

**Anti- $\beta$ -actin**

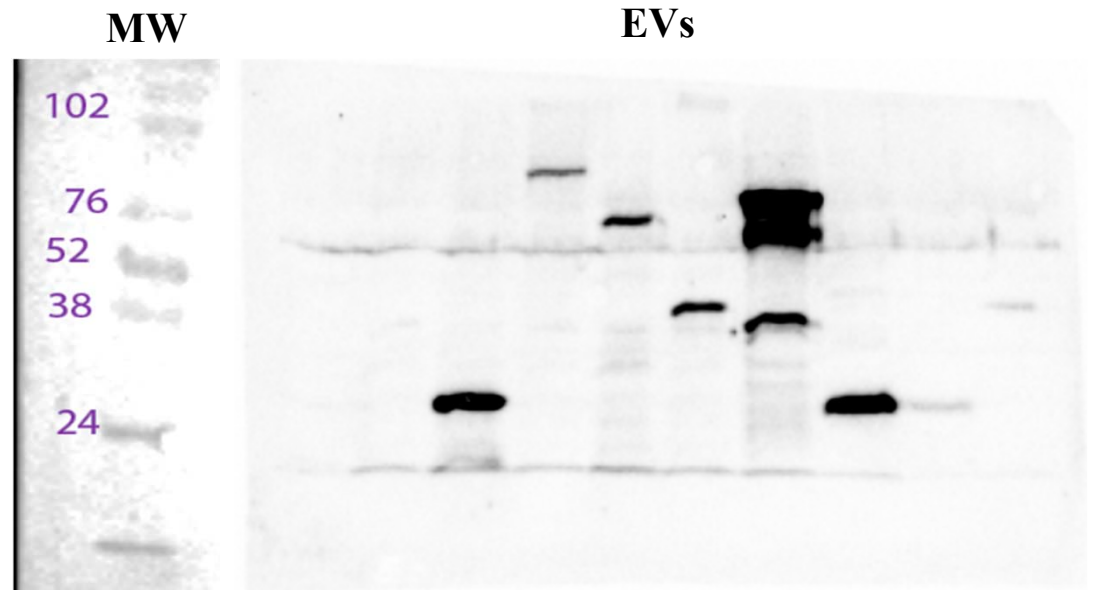

**Anti-Nef**

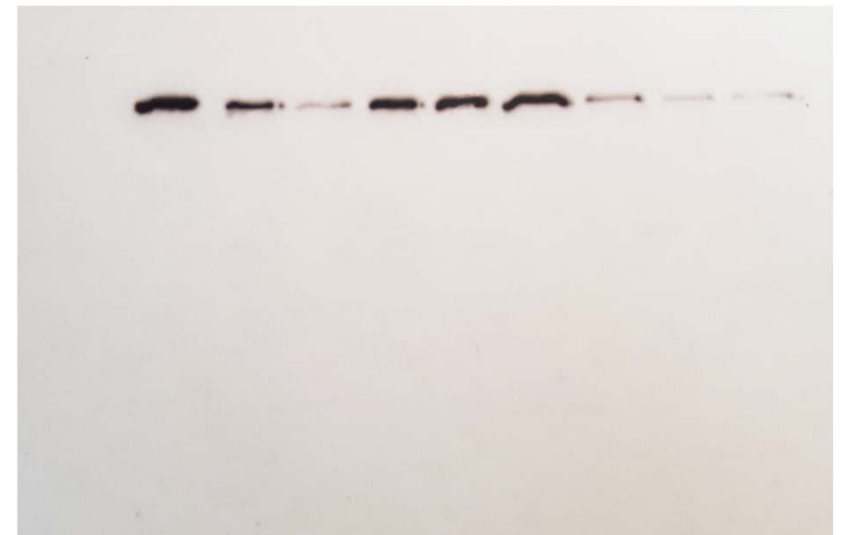

**Anti-Alix**
